# Supplementary material for: Divergent influence of {1 1 1} vs. {1 0 0} crystal planes and Yb3+ dopant on CO oxidation paths in mixed nano-sized oxide Au/Ce1−xYbxO2−x/2 (x = 0 or 0.1) systems
Source: Royal Society of Chemistry journal article supplement (doi:10.1039/d0ce00891e), 2020-01-01
Supplement: d0ce00891e1.pdf [file d0ce00891e1.pdf]

## Supplementary materials for

Divergent influence of {1 1 1} vs {1 0 0} crystal planes and Yb<sup>3+</sup> dopant on CO oxidation paths in mixed oxide nano-sized Au/Ce<sub>1-x</sub>Yb<sub>x</sub>O<sub>2-x/2</sub> (x = 0 or 0.1) systems.

Piotr Woźniak, Piotr Kraszkiewicz, Małgorzata A. Malecka\*

*Institute of Low Temperature and Structure Research, Polish Academy of Sciences,*

*P.O. Box 1410, 50-950 Wrocław 2, Poland*

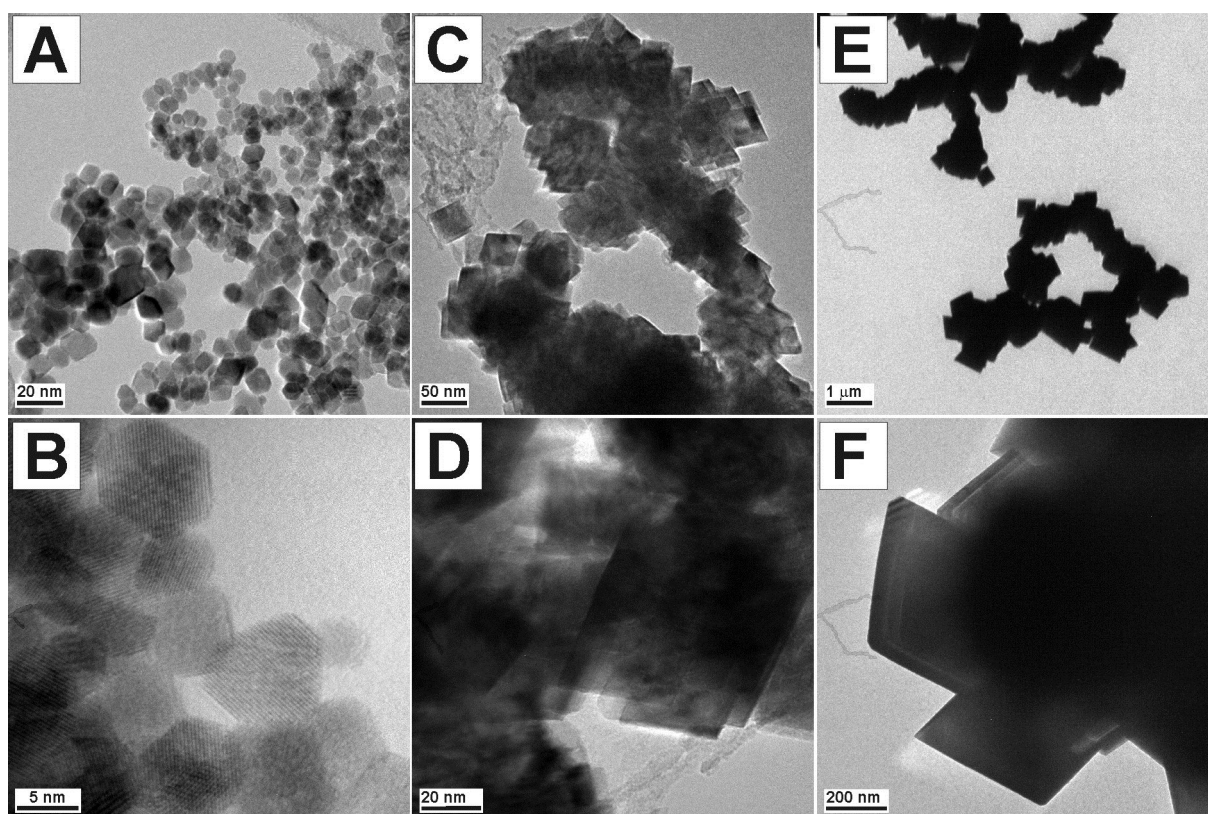

Fig.S1. TEM images of CeO<sub>2</sub> (octahedron-like) prepared by methods which using (A),(B) NH<sub>4</sub>OH, (C),(D) urea, (E),(F) without mineralizer (250 °C).

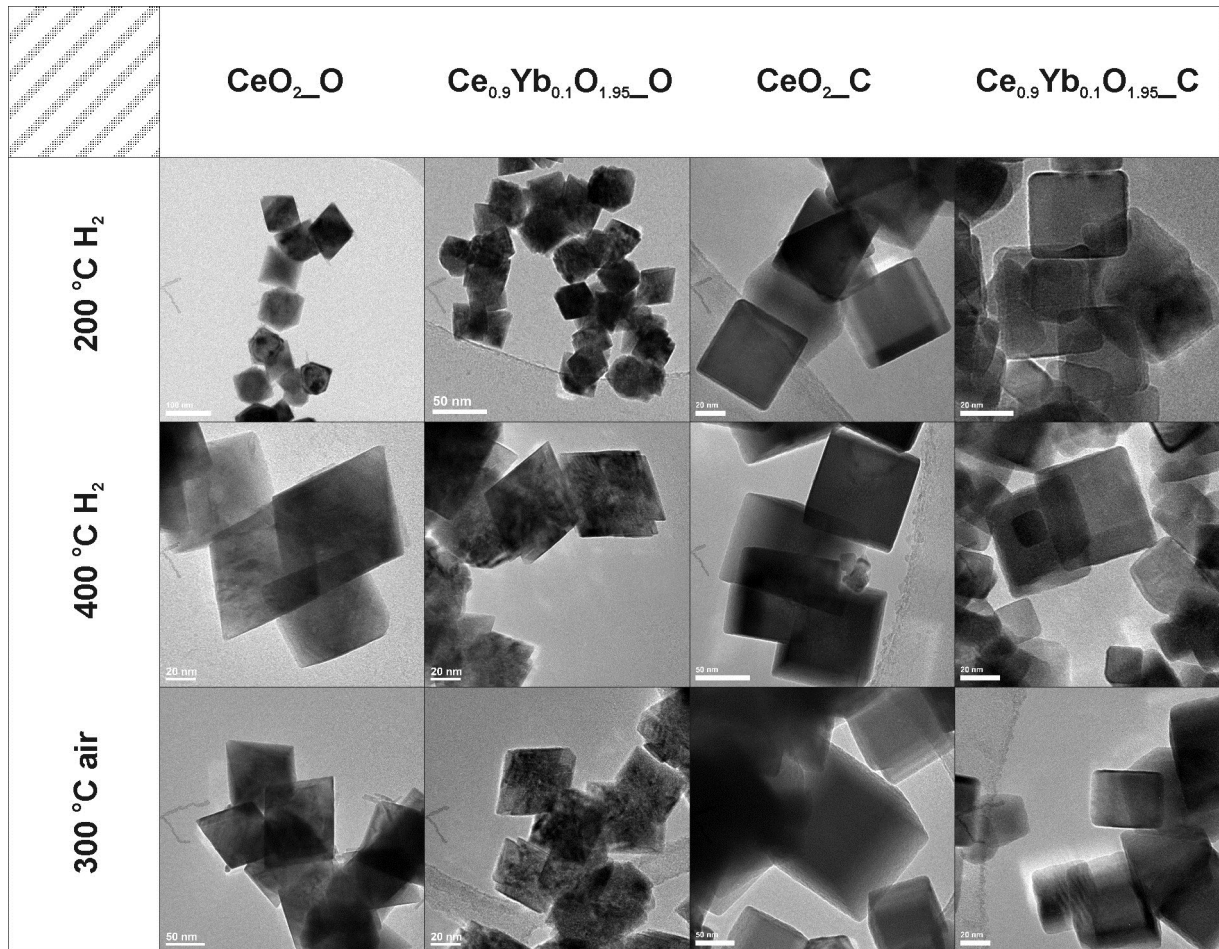

Fig.S2. TEM images of  $\text{CeO}_2$  and  $\text{Ce}_{0.9}\text{Yb}_{0.1}\text{O}_{1.95}$  after heat treatment at 200 °C and 400 °C under reducing conditions and 300 °C in static air.

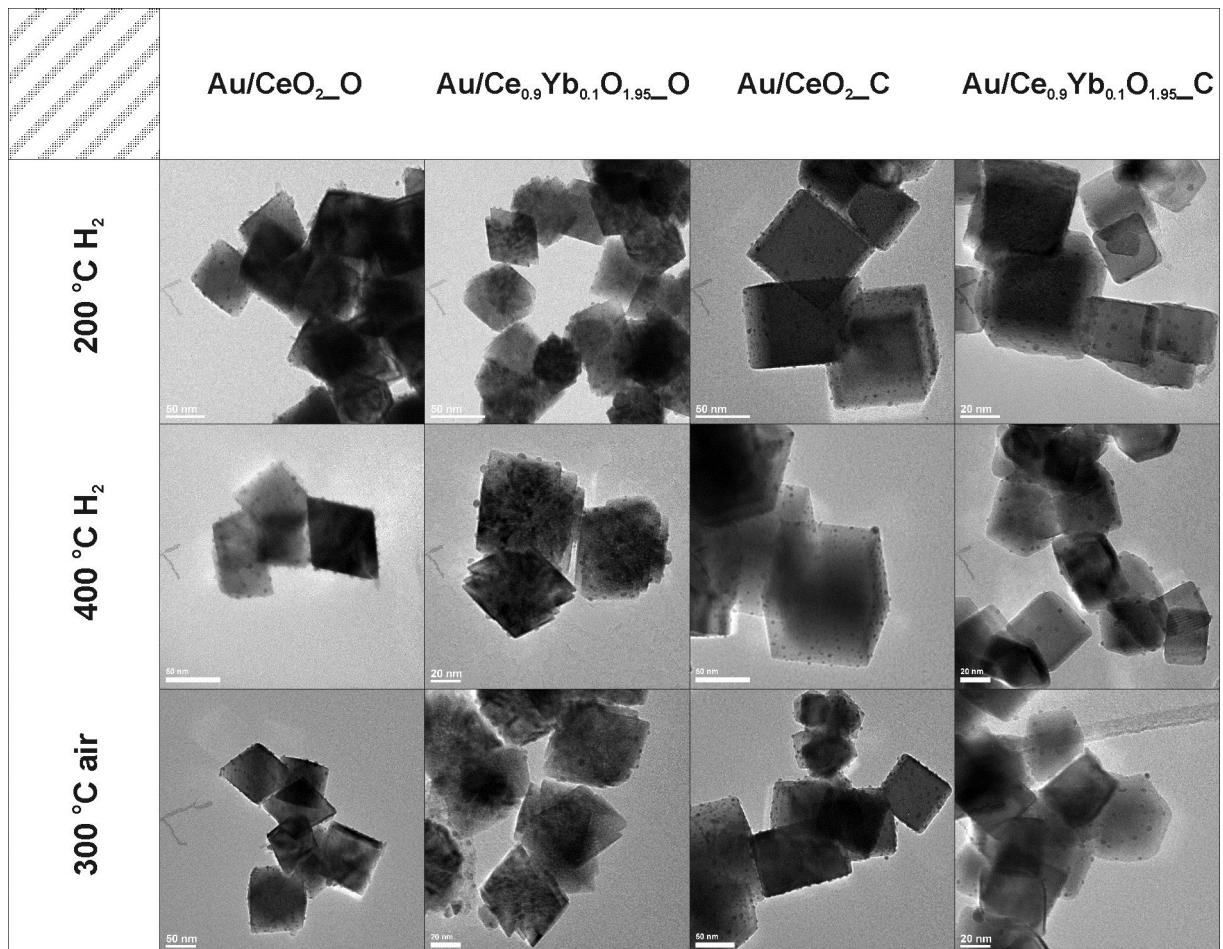

Fig.S3. TEM images of  $\text{Au/CeO}_2$  and  $\text{Au/Ce}_{0.9}\text{Yb}_{0.1}\text{O}_{1.95}$  after heat treatment at 200 °C and 400 °C under reducing conditions and 300 °C in static air.

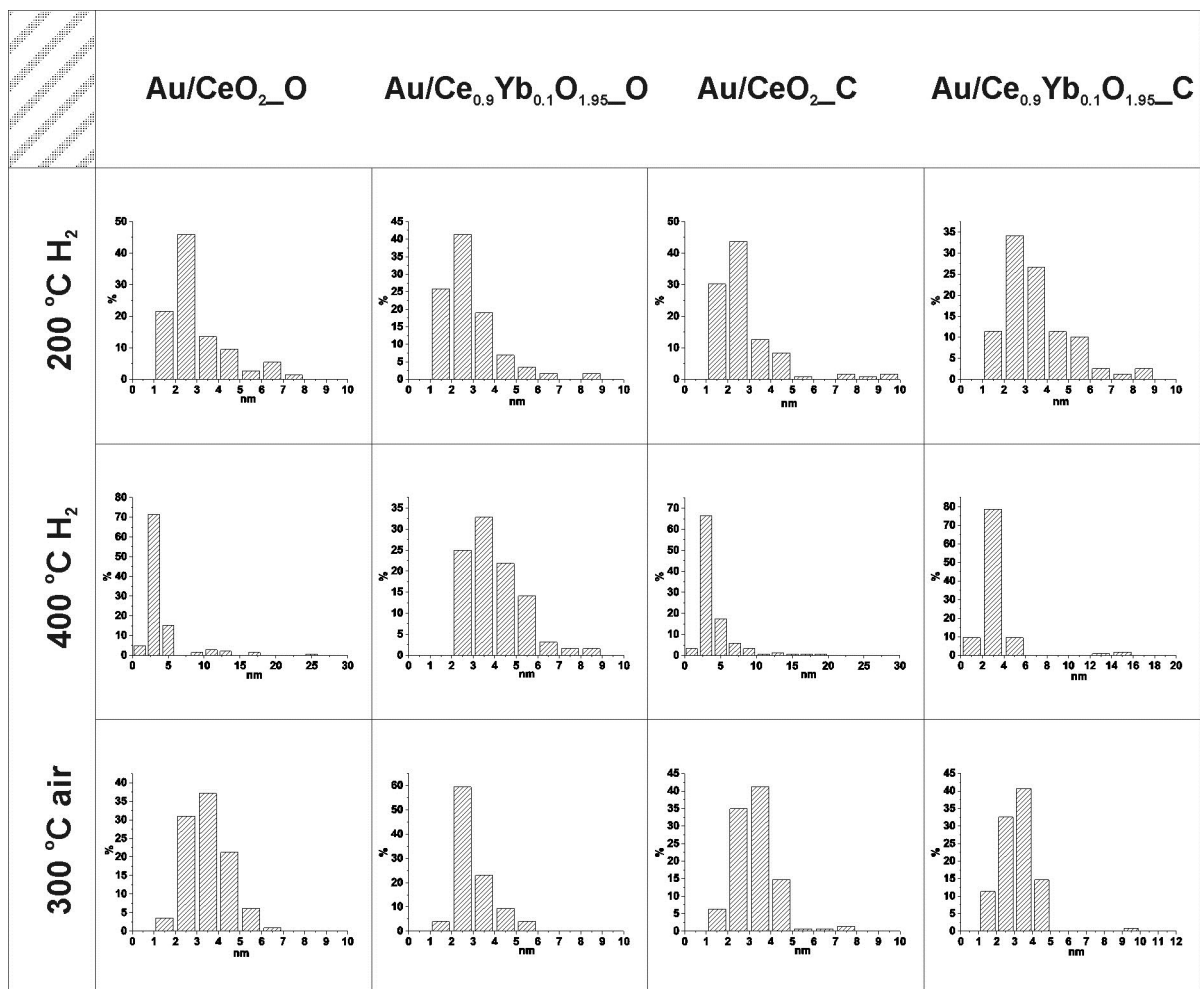

Fig.S4. Histograms of the Au nanoparticles sizes calculated for Au/CeO<sub>2</sub> and Au/Ce<sub>0.9</sub>Yb<sub>0.1</sub>O<sub>1.95</sub> after heat treatment at 200 °C and 400 °C under reducing conditions and 300 °C in static air.

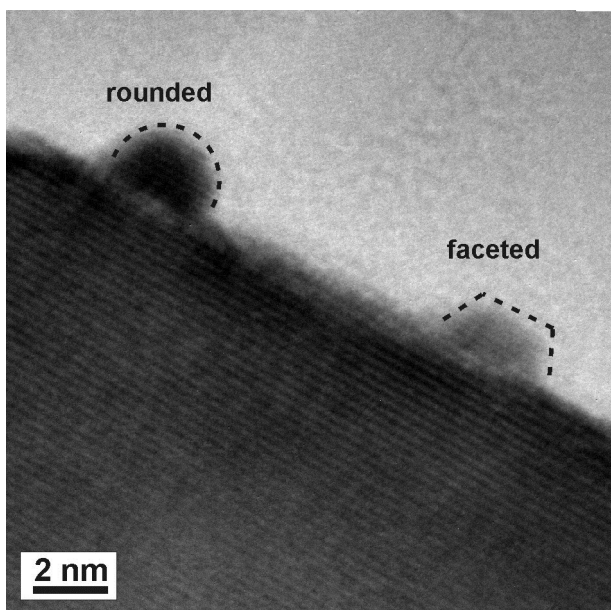

Fig.S5. HRTEM image of Au/Ce<sub>0.9</sub>Yb<sub>0.1</sub>O<sub>1.95</sub>\_C heated at 400 °C for 3h in H<sub>2</sub> flow.

Table 1S

Misfit values between Au and CeO<sub>2</sub> crystals (%misfit =  $(d_{\text{Au}} - d_{\text{support}}) / d_{\text{support}} \times 100$ )

| Misfit in %<br>For octahedron-like ceria<br>$d_{111_{\text{CeO}_2}} = 0.3124 \text{ nm}$ | Au planes                                 | Misfit in %<br>For cube-like ceria<br>$d_{100_{\text{CeO}_2}} = 0.2706 \text{ nm}$ |
|------------------------------------------------------------------------------------------|-------------------------------------------|------------------------------------------------------------------------------------|
| 24%                                                                                      | $d_{111_{\text{Au}}} = 0.2355 \text{ nm}$ | 13%                                                                                |
| 35%                                                                                      | $d_{200_{\text{Au}}} = 0.2039 \text{ nm}$ | 25%                                                                                |
| 54%                                                                                      | $d_{220_{\text{Au}}} = 0.1442 \text{ nm}$ | 47%                                                                                |
| 61%                                                                                      | $d_{311_{\text{Au}}} = 0.1230 \text{ nm}$ | 55%                                                                                |

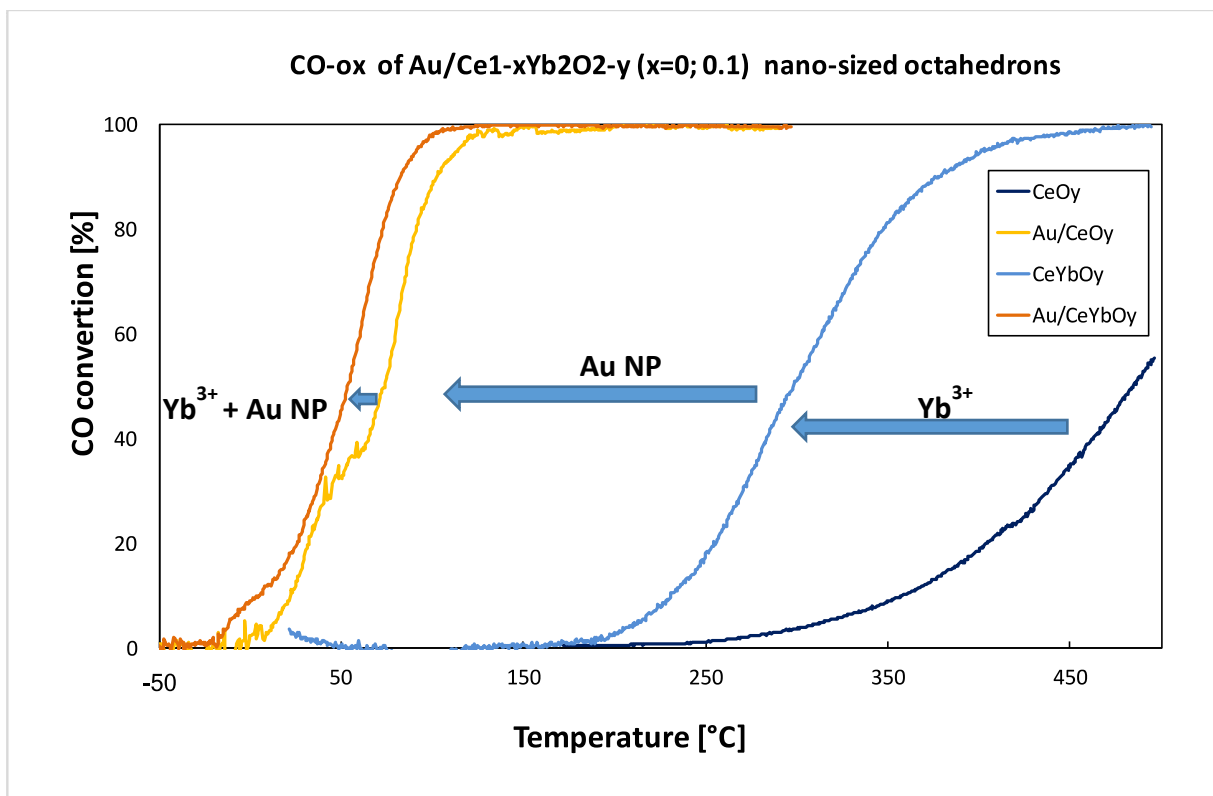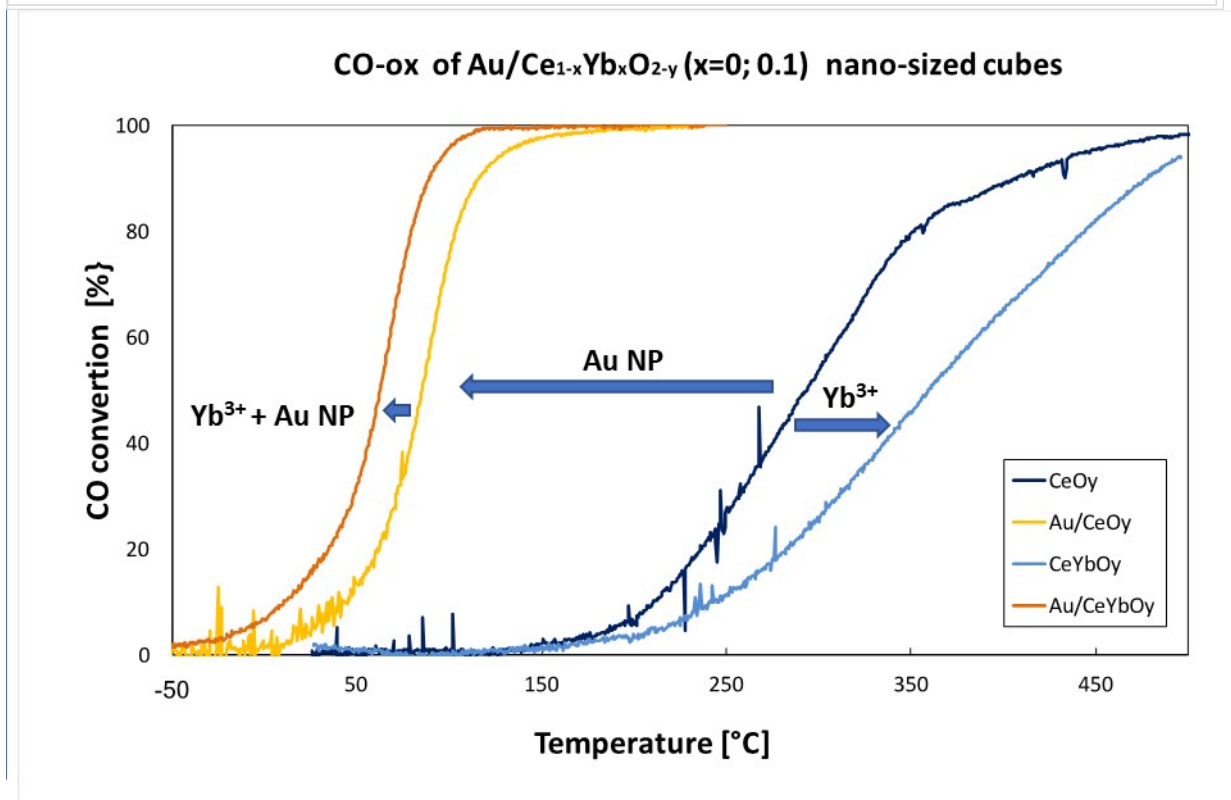

Fig.S6. The divergent influence of  $\{1\ 1\ 1\}$  vs  $\{1\ 0\ 0\}$  crystal planes and Yb<sup>3+</sup> dopant on CO oxidation paths in mixed oxide nano-sized Au/Ce<sub>1-x</sub>Yb<sub>x</sub>O<sub>2-x/2</sub> (x = 0 or 0.1; O or C) systems (CO oxidation activity).

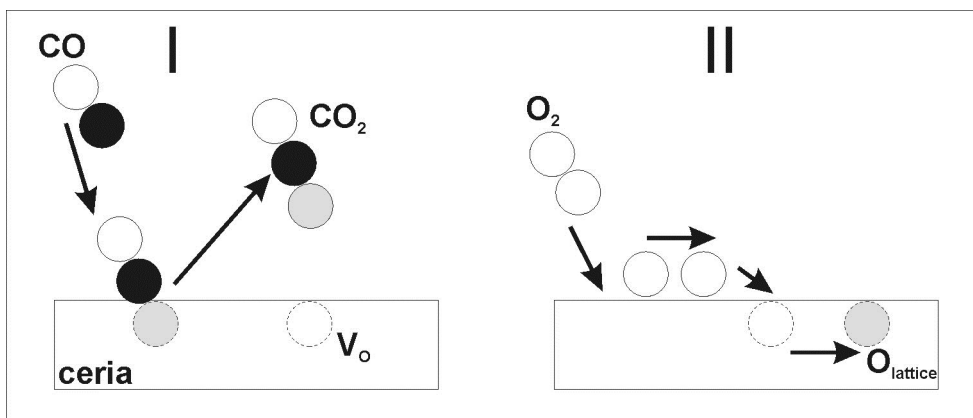

Fig.S7. CO oxidation by  $O_2$  on ceria based oxide as a catalyst.

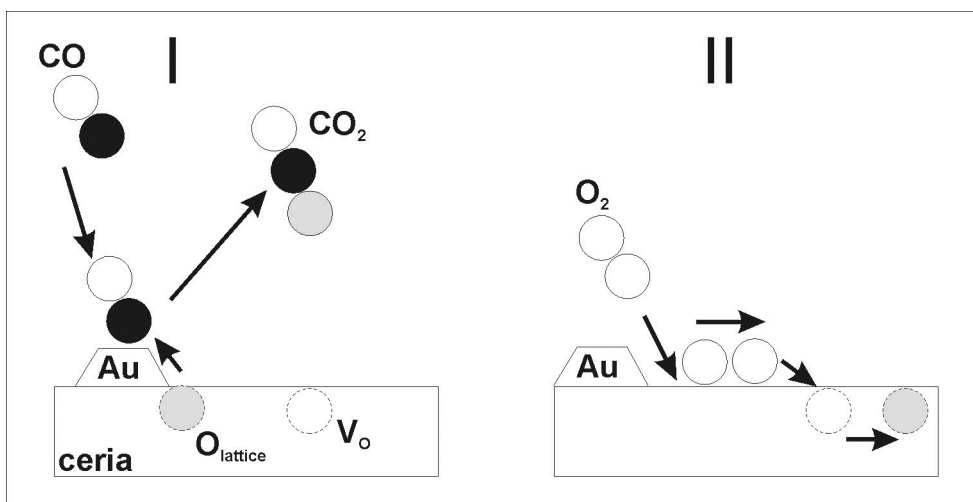

Fig.S8. CO oxidation by  $O_2$  on ceria based oxide decorated by nanocrystalline Au as a catalyst.

Table 2S

The oxygen vacancy ( $O_v$ ) formation energies of pure and Co-doped ceria 1 1 1 and 1 0 0 facets – literature data [Phys. Chem. Chem. Phys., 20 (2018) 16045-16059]

| Sample/facet | $CeO_2$ | Co- $CeO_2$ |
|--------------|---------|-------------|
| 1 1 1        | 2.42 eV | -0.08 eV    |
| 1 0 0        | 1.75 eV | 0.24 eV     |
